# Supplementary material
Source: MDPI journal article supplement (https://www.mdpi.com/2079-9292/12/14/3031)
Supplement: s1 [file s1]

Archive with 3 entries (3 files):
- Supporting Information.pdf
- Video S1.mp4
- Video S2.mp4
